# Supplementary material
Source: PubMed Central journal article supplement (PMC8128563)
Supplement: AJNR_07_00936.pdf [file AJNR_07_00936.pdf]

**On-line Table 1: Demographic data for subjects with mild TBI and summary of conventional clinical findings**

| Patient | Age (Years) | Sex | GCS | HISC* | Time Since TBI (months) | No. TMH | Conventional Clinical MR Imaging Findings                           |
|---------|-------------|-----|-----|-------|-------------------------|---------|---------------------------------------------------------------------|
| 1       | 31          | F   | 15  | 1     | 35                      | 1       | L temporal CHC; R frontal CHC; TMH in L thalamus                    |
| 2       | 43          | M   | 15  | 19    | 6                       | 3       | R+L frontal CHC; L temporal CHC                                     |
| 3       | 25          | M   | 15  | 4     | 38                      | 15      | R inferior frontal CHC                                              |
| 4       | 37          | M   | 15  | 1     | 10                      | 0       | Normal                                                              |
| 5       | 60          | M   | 15  | 6     | 56                      | 0       | Multiple NWMH; basal ganglia lacunar infarct                        |
| 6       | 61          | F   | 15  | 7     | 19                      | 19      | R+L frontal CHC; L temporal CHC; R parietal CHC; NWMH               |
| 7       | 40          | M   | 15  | 8     | 18                      | 0       | R+L frontal CHC; R+L temporal CHC                                   |
| 8       | 17          | M   | 15  | 2     | 6                       | 0       | Normal                                                              |
| 9       | 16          | F   | 15  | 3     | 6                       | 0       | Single NWMH                                                         |
| 10      | 42          | F   | 15  | 15    | 37                      | 0       | NWMH                                                                |
| 11      | 40          | M   | 14  | 6     | 13                      | 0       | R+L frontal CC; R+L temporal CC                                     |
| 12      | 45          | M   | 15  | 3     | 51                      | 0       | NWHM                                                                |
| 13      | 29          | F   | 15  | 5     | 29                      | 0       | Normal                                                              |
| 14      | 37          | M   | 15  | 2     | 20                      | 1       | L frontal CHC; L temporal CHC; R frontal CHC                        |
| 15      | 50          | M   | 15  | 2     | 44                      | 0       | NWMH                                                                |
| 16      | 20          | M   | 15  | 3     | 1                       | 4       | R temporal CHC                                                      |
| 17      | 32          | M   | 15  | NA    | 3                       | 0       | R temporal CHC; L temporal CC                                       |
| 18      | 35          | F   | 15  | 3     | 12                      | 0       | Normal                                                              |
| 19      | 26          | M   | 15  | 2     | 10                      | 0       | Normal                                                              |
| 20      | 44          | M   | 15  | 3     | 40                      | 0       | NWMH                                                                |
| 21      | 52          | F   | 15  | 10    | 53                      | 0       | Normal                                                              |
| 22      | 49          | F   | 15  | NA    | 35                      | 0       | Normal                                                              |
| 23      | 32          | F   | 15  | NA    | 13                      | 0       | Normal                                                              |
| 24      | 48          | F   | 15  | NA    | 13                      | 0       | Normal                                                              |
| 25      | 50          | M   | 15  | NA    | 27                      | 0       | NWMH                                                                |
| 26      | 43          | M   | 15  | 4     | 3                       | 0       | NWMH                                                                |
| 27      | 23          | M   | 15  | NA    | 65                      | 0       | Normal                                                              |
| 28      | 39          | F   | 13  | 8     | 12                      | 3       | L temporal CHC; L parietal CHC; L frontal chronic subdural hematoma |
| 29      | 46          | F   | 14  | 1     | 8                       | 2       | R temporal CC; NWMH                                                 |
| 30      | 25          | F   | 15  | 3     | 7                       | 4       | TMH                                                                 |
| 31      | 23          | F   | 15  |       | 29                      | 0       | L frontal CHC                                                       |
| 32      | 47          | F   | 15  | 13    | 17                      | 0       | Normal                                                              |
| 33      | 36          | F   | 14  | 6     | 12                      | 4       | L temporal CHC, L parietal CHC                                      |
| 34      | 27          | M   | 15  | 4     | 12                      | 19      | TMH                                                                 |

**Note:**—GCS indicates Glasgow Coma Scale; HISC, head injury symptom checklist; TMH, traumatic microhemorrhages, L, left; R, right; CHC, chronic hemorrhagic contusion; NA, not applicable; CC, chronic (nonhemorrhagic) contusion; NWMH, nonspecific white matter hyperintensities.

\* The HISC score is the number of symptoms self-reported by the patient at time of testing. HISC data are unavailable for patients 17, 22–25, 27, and 31.

**On-line Table 2: Locations of traumatic axonal injury lesions based on DTI in each subject with mild TBI\***

| Patient             | ACR  | UNC  | Genu | Cing | ILF  | SCR  | pct  | plic | CP   | alic | mcp  | scp  | Fmaj | BCC  | SLF† | dscp | Total |
|---------------------|------|------|------|------|------|------|------|------|------|------|------|------|------|------|------|------|-------|
| 1                   |      |      |      | X    | X    | X    | X    |      | X    |      |      |      | X    | X    |      |      | 7     |
| 2                   |      | X    | X    | X    |      |      |      | X    | X    |      | X    |      |      |      |      |      | 6     |
| 3                   | X    | X    | X    |      | X    | X    |      |      |      |      |      |      |      |      |      |      | 5     |
| 4                   | X    | X    | X    | X    |      |      |      | X    |      |      |      |      |      |      |      |      | 5     |
| 5                   | X    | X    |      |      | X    |      | X    |      |      |      |      |      |      |      |      |      | 4     |
| 6                   | X    | X    | X    |      |      |      |      |      |      | X    |      |      |      |      |      |      | 4     |
| 7                   |      | X    |      |      | X    |      | X    |      |      |      |      |      |      |      |      |      | 3     |
| 8                   |      | X    |      |      | X    |      |      | X    |      |      |      |      |      |      |      |      | 3     |
| 9                   | X    |      | X    | X    |      |      |      |      |      |      |      |      |      |      |      |      | 3     |
| 10                  | X    |      | X    |      |      |      |      |      |      |      |      | X    |      |      |      |      | 3     |
| 11                  |      | X    | X    | X    |      |      |      |      |      |      |      |      |      |      |      |      | 3     |
| 12                  |      |      |      |      |      | X    |      |      |      |      |      |      |      |      |      | X    | 2     |
| 13                  | X    |      |      |      |      | X    |      |      |      |      |      |      |      |      |      |      | 2     |
| 14                  | X    |      |      |      | X    |      |      |      |      |      |      |      |      |      |      |      | 2     |
| 15                  |      |      |      | X    |      |      |      |      |      |      |      |      |      |      | X    |      | 2     |
| 16                  | X    |      |      |      |      |      |      |      | X    |      |      |      |      |      |      |      | 2     |
| 17                  | X    |      |      | X    |      |      |      |      |      |      |      |      |      |      |      |      | 2     |
| 18                  |      |      |      |      |      |      | X    |      |      |      |      |      |      |      |      |      | 1     |
| 19                  |      |      |      |      |      |      |      |      |      | X    |      |      |      |      |      |      | 1     |
| 20                  | X    |      |      |      |      |      |      |      |      |      |      |      |      |      |      |      | 1     |
| 21                  | X    |      |      |      |      |      |      |      |      |      |      |      |      |      |      |      | 1     |
| 22                  |      | X    |      |      |      |      |      |      |      |      |      |      |      |      |      |      | 1     |
| 23                  |      |      |      |      |      |      |      |      |      |      | X    |      |      |      |      |      | 1     |
| 24                  | X    |      |      |      |      |      |      |      |      |      |      |      |      |      |      |      | 1     |
| 25                  |      | X    |      |      |      |      |      |      |      |      |      |      |      |      |      |      | 1     |
| 26                  |      |      |      |      |      |      |      |      |      |      |      | X    |      |      |      |      | 1     |
| 27                  |      |      |      |      |      | X    |      |      |      |      |      |      |      |      |      |      | 1     |
| 28                  | X    |      |      |      |      |      |      |      |      |      |      |      |      |      |      |      | 1     |
| 29                  |      |      |      |      |      |      | X    |      |      |      |      |      |      |      |      |      | 1     |
| 30                  |      |      |      |      |      |      |      |      |      |      |      |      |      |      |      |      | 0     |
| 31                  |      |      |      |      |      |      |      |      |      |      |      |      |      |      |      |      | 0     |
| 32                  |      |      |      |      |      |      |      |      |      |      |      |      |      |      |      |      | 0     |
| 33                  |      |      |      |      |      |      |      |      |      |      |      |      |      |      |      |      | 0     |
| 34                  |      |      |      |      |      |      |      |      |      |      |      |      |      |      |      |      | 0     |
| Total               | 14   | 10   | 7    | 7    | 6    | 5    | 5    | 3    | 3    | 2    | 2    | 2    | 1    | 1    | 1    | 1    |       |
| Mean FA (controls)  | 0.53 | 0.57 | 0.81 | 0.70 | 0.64 | 0.47 | 0.53 | 0.71 | 0.75 | 0.63 | 0.71 | 0.73 | 0.72 | 0.74 | 0.58 | 0.50 |       |
| 2.5-SD threshold FA | 0.45 | 0.45 | 0.71 | 0.58 | 0.47 | 0.3  | 0.37 | 0.60 | 0.59 | 0.46 | 0.54 | 0.55 | 0.37 | 0.59 | 0.40 | 0.33 |       |

**Note:**—ACR indicates anterior corona radiata; UNC, uncinata fasciculus; Genu, genu of the corpus callosum; Cing, cingulum bundle; ILF, inferior longitudinal fasciculus; SCR, superior corona radiata; pct, pontine crossing tract; plic, posterior limb of the internal capsule; CP, cerebral peduncle; alic, anterior limb of the internal capsule; mcp, middle cerebellar peduncle; scp, superior cerebellar peduncle; Fmaj, forceps major; BCC, body of the corpus callosum; SLF, superior longitudinal fasciculus at the level of the cingulum bundle; dscp, decussation of the scp; X, location of the lesion.

\* The structure was noted as damaged if the FA was 2.5 SDs less than the average FA of 26 healthy control subjects in either hemisphere. The mean FA of these control subjects is listed in the second-to-last row. The FA below which a structure was considered to have a traumatic axonal injury lesion is listed in the final row. Patient numbers correspond to demographic information in Table 1. Columns are sorted such that the most commonly damaged structure is at the far left. Rows are sorted such that the patient with the most DTI lesions is at the top.

† The SLF at the level of the BCC, forceps minor, centrum semiovale, and splenium did not have FA loss of >2.5 SDs in any of the patients.
